# Supplementary material for: Microbial Diversity and Authigenic Mineral Formation of Modern Bottom Sediments in the Littoral Zone of Lake Issyk-Kul, Kyrgyz Republic (Central Asia)
Source: MDPI journal article supplement (doi:10.3390/biology12050642), 2023-04-23
Supplement: s1 [file s1]

## Supplementary Materials

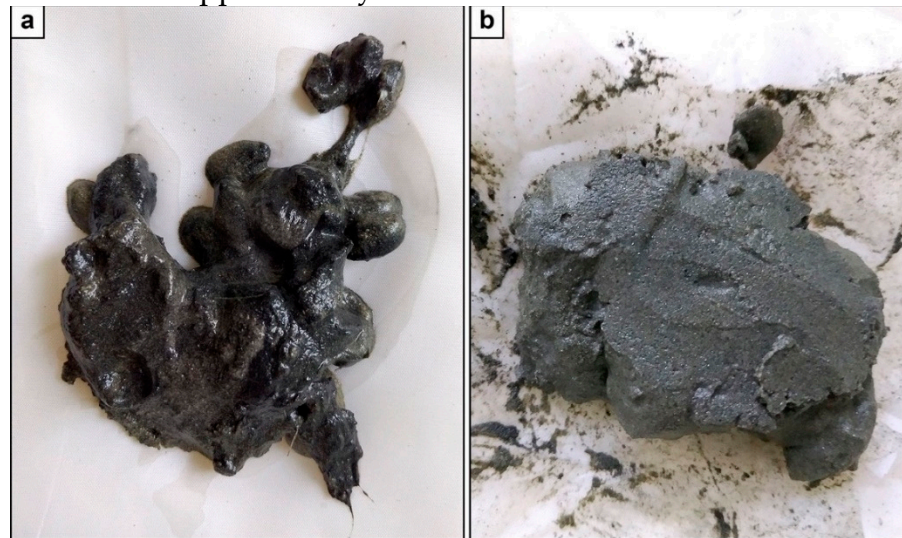

**Figure S1.** Bottom sediment samples from point IS-1. a. black silt in 0–5 cm; b. gray silt in 25–30 cm.

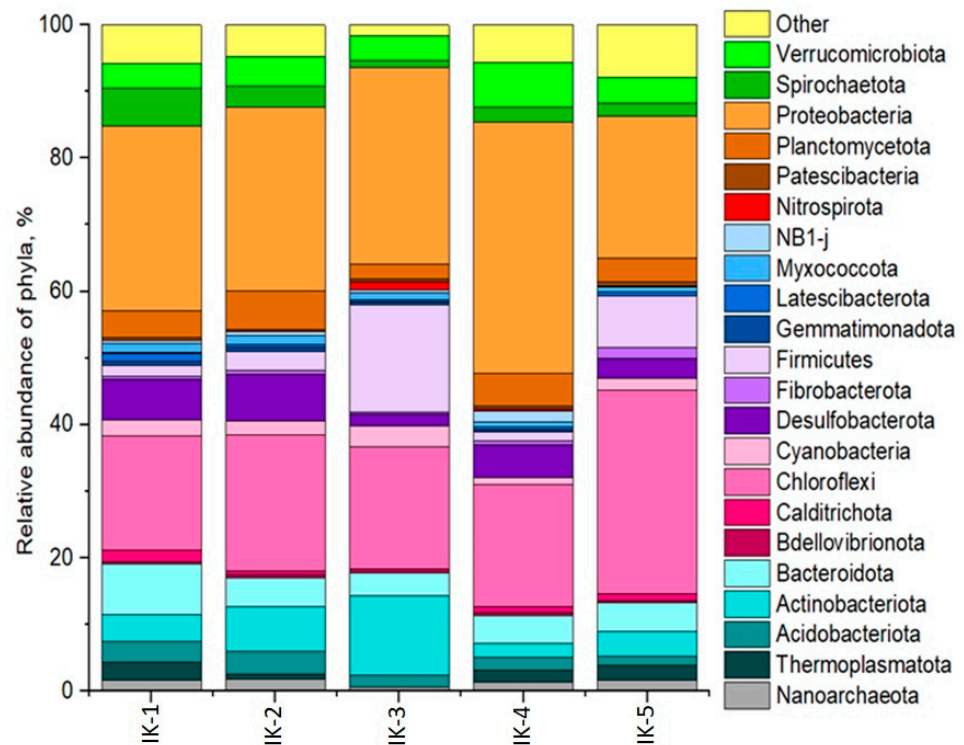

**Figure S2.** Phylogenetic diversity of bottom sediment microbial communities based on the analysis of 16S rRNA gene sequences at the phylum level.

**Table S1.** Diversity index of microbial communities in bottom sediments samples.

| Sample         | IK-1   | IK-2   | IK-3   | IK-4   | IK-5   |
|----------------|--------|--------|--------|--------|--------|
| OTU            | 422    | 463    | 394    | 395    | 503    |
| Simpson_1-D    | 0.9795 | 0.981  | 4.902  | 0.9453 | 0.9594 |
| Shannon_H      | 4.856  | 5.008  | 0.3416 | 4.247  | 4.51   |
| Equitability_J | 0.8034 | 0.8159 | 0.8203 | 0.7103 | 0.725  |
